# Supplementary figures and images for: Mapping global environmental suitability for Zika virus
Source: eLife journal article supplement (doi:10.7554/elife.15272), 2016-04-19

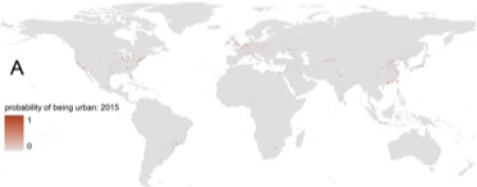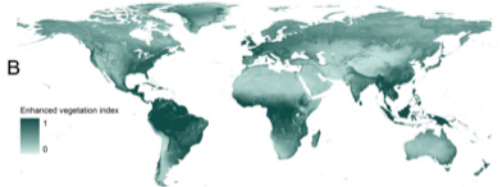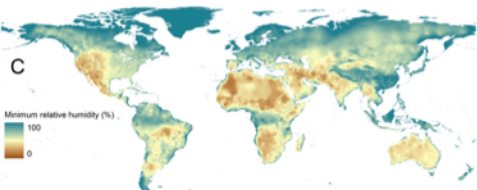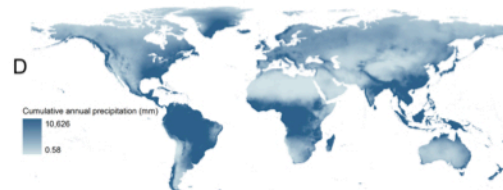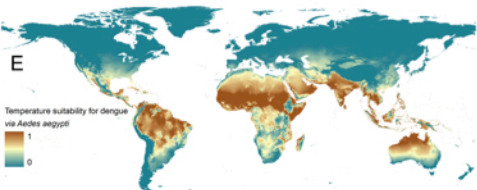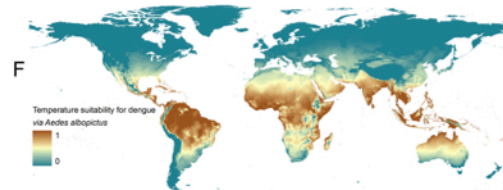

Supplement: supp [file elife_poa_e15272_Figure_1_figure_supplement_1.pdf › elife_poa_e15272_Figure_1_figure_supplement_1.pdf]

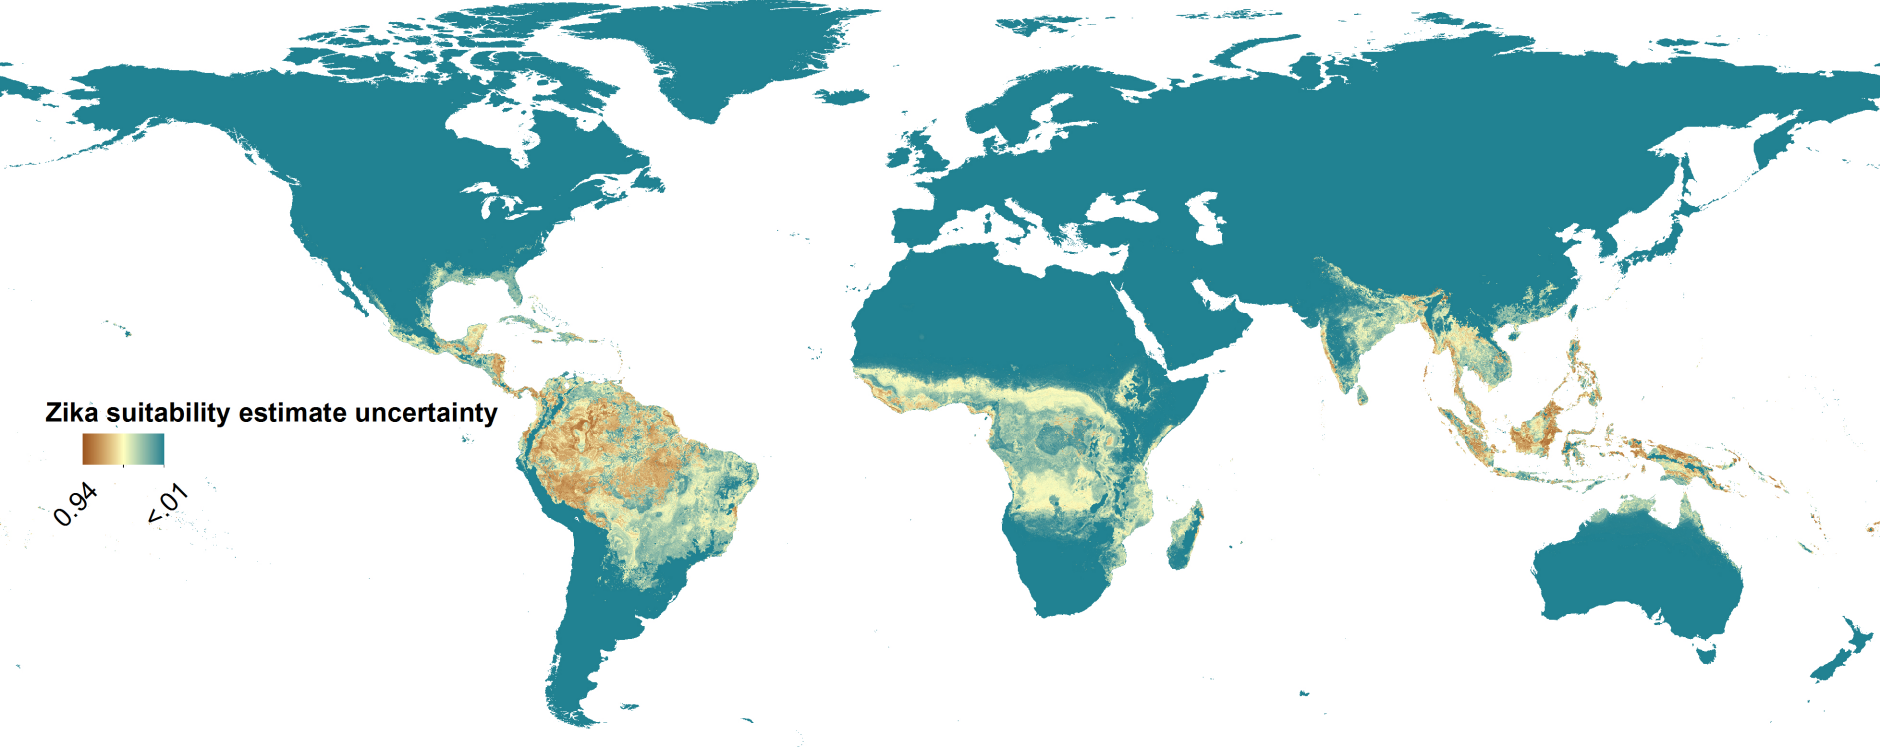

Zika suitability estimate uncertainty

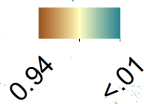

Supplement: supp [file elife_poa_e15272_Figure_2_figure_supplement_1.pdf › elife_poa_e15272_Figure_2_figure_supplement_1.pdf]

A

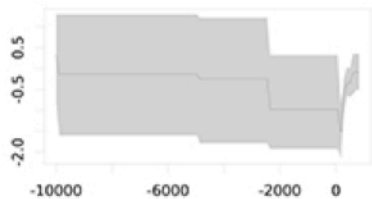

B

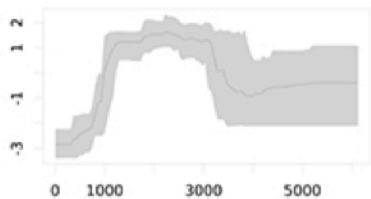

C

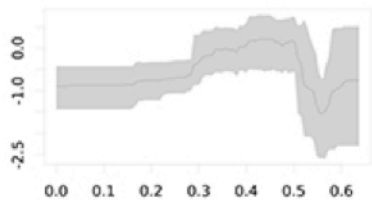

D

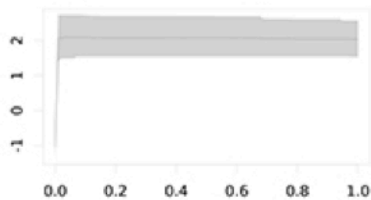

E

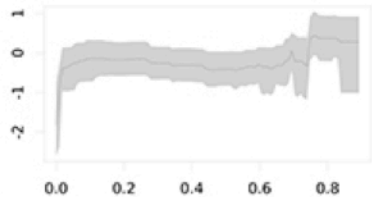

F

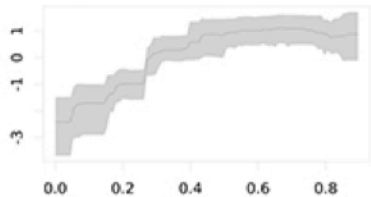

Supplement: supp [file elife_poa_e15272_Figure_2_figure_supplement_2.pdf › elife_poa_e15272_Figure_2_figure_supplement_2.pdf]

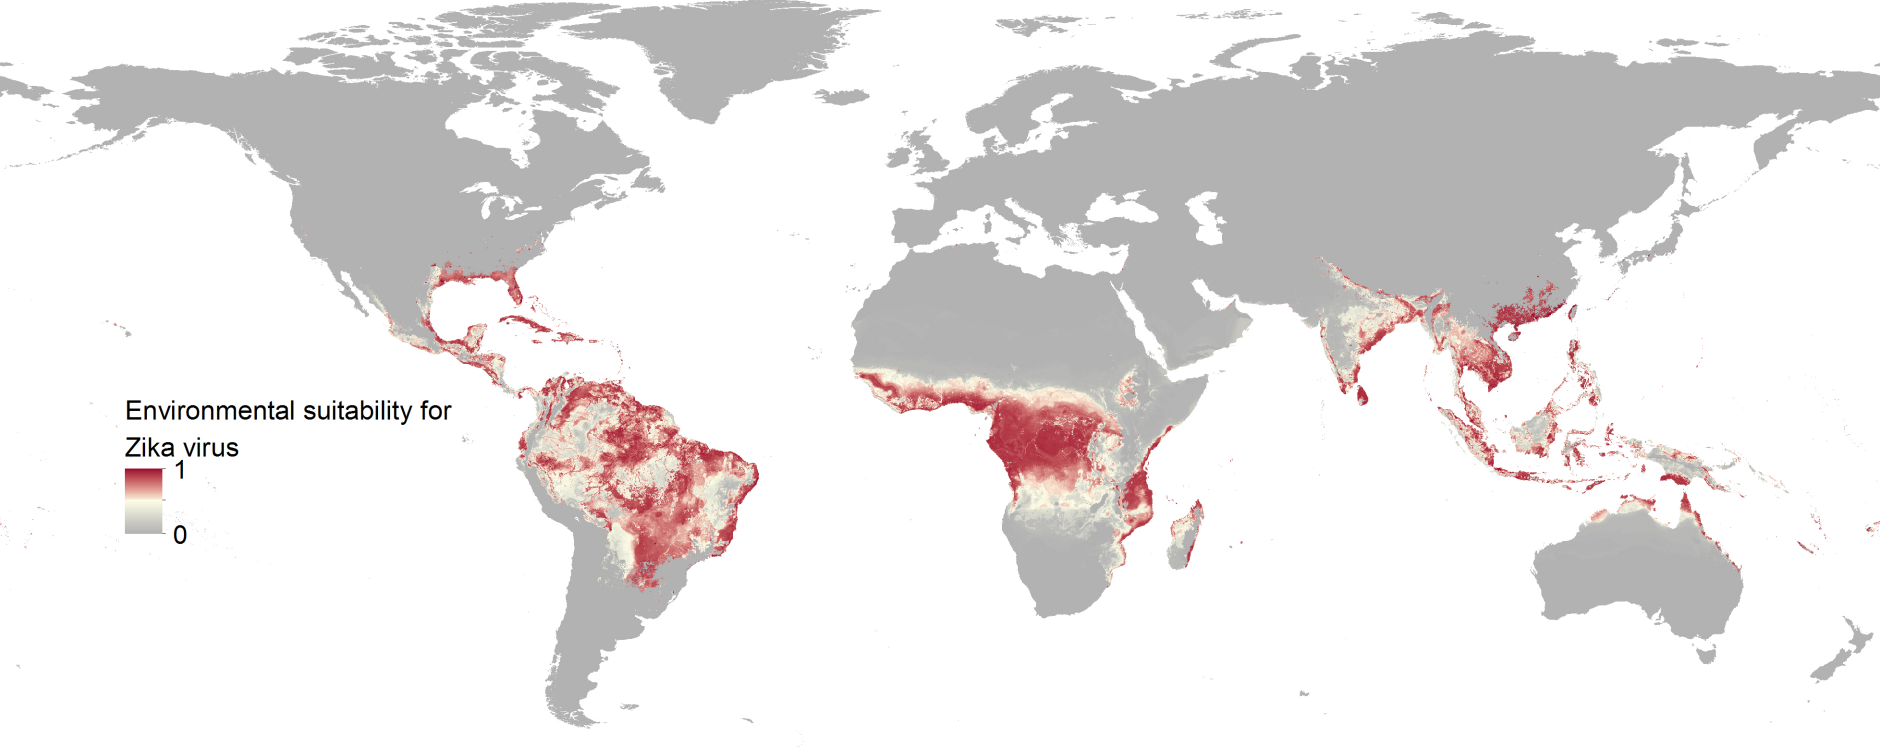

Environmental suitability for  
Zika virus

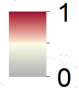

Supplement: supp [file elife_poa_e15272_Figure_2_figure_supplement_3.pdf › elife_poa_e15272_Figure_2_figure_supplement_3.pdf]

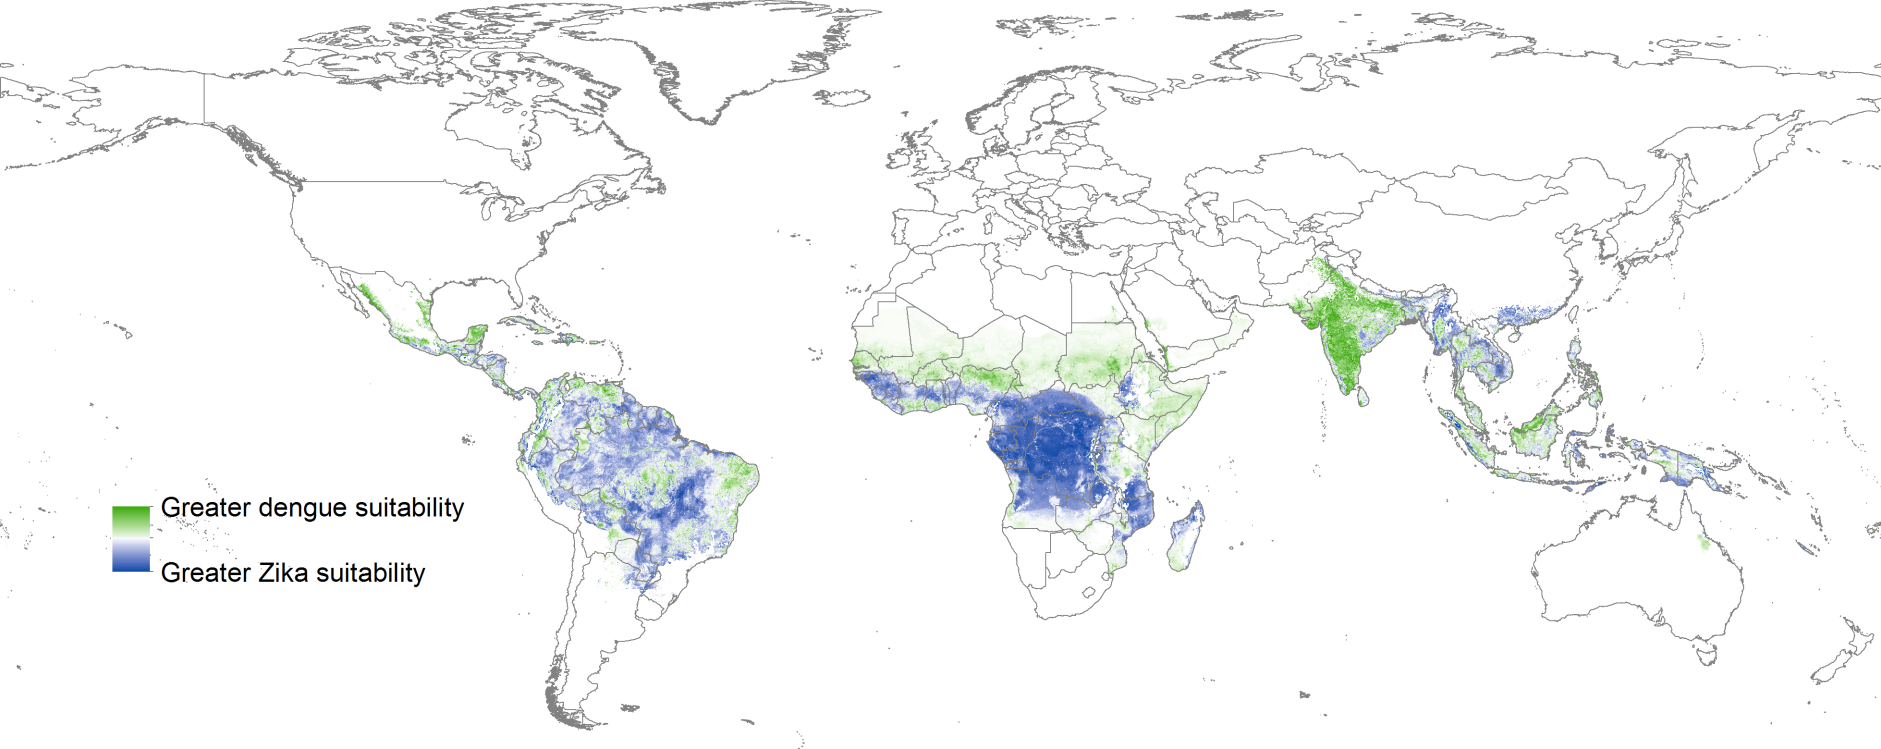

Supplement: supp [file elife_poa_e15272_Figure_2_figure_supplement_4.pdf › elife_poa_e15272_Figure_2_figure_supplement_4.pdf]
